# Supplementary material for: A survey of visitors on Swedish livestock farms with reference to the spread of animal diseases
Source: PubMed Central journal article supplement (PMC3848732; doi:10.1186/1746-6148-9-184), 2013-09-16
Supplement: 1746-6148-9-184-S1.pdf [file 1746-6148-9-184-S1.pdf]

# Contacts/visits Wednesday November 15th

PPN:

|                                    |                                       |                  |                                            |
|------------------------------------|---------------------------------------|------------------|--------------------------------------------|
| Number of contacts or visits today | Number in direct contact with animals | Number in stable | Number in areas where there are no animals |
|------------------------------------|---------------------------------------|------------------|--------------------------------------------|

## Transports

|                     |  |  |  |  |
|---------------------|--|--|--|--|
| Milk truck (driver) |  |  |  |  |
| Feed truck (driver) |  |  |  |  |

## Professional visits

|                                            |  |  |  |  |
|--------------------------------------------|--|--|--|--|
| Temporary employee                         |  |  |  |  |
| AI-technician                              |  |  |  |  |
| Veterinarian                               |  |  |  |  |
| Sample collector (control programme)       |  |  |  |  |
| Control milking                            |  |  |  |  |
| Hoof trimmer                               |  |  |  |  |
| Sheep shearer                              |  |  |  |  |
| Production advisor                         |  |  |  |  |
| Inspector from municipality or county      |  |  |  |  |
| Salesman                                   |  |  |  |  |
| Repairman                                  |  |  |  |  |
| Animal transporter (live or for slaughter) |  |  |  |  |
| Transporter of dead stock                  |  |  |  |  |
| Other type of professional visit           |  |  |  |  |

**No visits/contacts today**  
(mark with an X if there were no contacts today)

## Other visitors

### Does visitor have animals?

|                        |  | cattle | pig | sheep | goat | no | do not know |
|------------------------|--|--------|-----|-------|------|----|-------------|
| Fieldtrip              |  |        |     |       |      |    |             |
| "Stay on a farm"       |  |        |     |       |      |    |             |
| Customers in farm shop |  |        |     |       |      |    |             |
| Neighbours             |  |        |     |       |      |    |             |
| Other visits           |  |        |     |       |      |    |             |

## Animals and dead stock

X if "yes"

|                                          |  |                           |
|------------------------------------------|--|---------------------------|
| Animals entering farm (purchase or loan) |  | Species and number: _____ |
| Animals have been to exhibition          |  | Where: _____              |
| Dead stock collected on farm             |  |                           |
| Live animal collected on farm            |  |                           |
| Animal for slaughter collected on farm   |  |                           |

## Borrowed/rented/shared equipment

|                              |                          |                              |
|------------------------------|--------------------------|------------------------------|
| Received shared equipment    | <input type="checkbox"/> | If yes, indicate what: _____ |
| Dispatch of shared equipment | <input type="checkbox"/> | If yes, indicate what: _____ |

## Visited other farm

|                                            |                          |                              |
|--------------------------------------------|--------------------------|------------------------------|
| Visited farm with cattle/pigs/sheep/goats? | <input type="checkbox"/> | If yes: which species: _____ |
|--------------------------------------------|--------------------------|------------------------------|

Space for comments:
